# Supplementary material for: Impaired IFNγ-Signaling and Mycobacterial Clearance in IFNγR1-Deficient Human iPSC-Derived Macrophages
Source: PubMed Central journal article supplement — Stem Cell Reports. 2017 Dec 14;10(1):7–16. doi: 10.1016/j.stemcr.2017.11.011 (PMC5768914; doi:10.1016/j.stemcr.2017.11.011), 2017-12-14
Supplement: mmc2.pdf [file mmc2.pdf]

## Impaired IFN $\gamma$ -Signaling and Mycobacterial Clearance in IFN $\gamma$ RI-Deficient Human iPSC-Derived Macrophages

Anna-Lena Neehus,<sup>1,2,13</sup> Jenny Lam,<sup>1,2,13</sup> Kathrin Haake,<sup>1,2</sup> Sylvia Merkert,<sup>2,3,4</sup> Nico Schmidt,<sup>1,2</sup> Adele Mucci,<sup>1,2,12</sup> Mania Ackermann,<sup>1,2</sup> Madline Schubert,<sup>2,3,4</sup> Christine Happel,<sup>4,5</sup> Mark Philipp Kühnel,<sup>4,6</sup> Patrick Blank,<sup>7</sup> Friederike Philipp,<sup>1,2,8</sup> Ralph Goethe,<sup>9</sup> Danny Jonigk,<sup>4,6</sup> Ulrich Martin,<sup>3,4</sup> Ulrich Kalinke,<sup>7</sup> Ulrich Baumann,<sup>5</sup> Axel Schambach,<sup>1,2,10</sup> Joachim Roesler,<sup>11</sup> and Nico Lachmann<sup>1,2,\*</sup>

<sup>1</sup>Institute of Experimental Hematology, Hannover Medical School, Carl-Neuberg-Strasse 1, 30625 Hannover, Germany

<sup>2</sup>REBIRTH Cluster of Excellence, Hannover Medical School, 30625 Hannover, Germany

<sup>3</sup>Leibniz Research Laboratories for Biotechnology and Artificial Organs (LEBAO), Department of Cardiothoracic, Transplantation and Vascular Surgery, Hannover Medical School, 30625 Hannover, Germany

<sup>4</sup>Biomedical Research in Endstage and Obstructive Lung Disease (BREATH), German Center for Lung Research, 30625 Hannover, Germany

<sup>5</sup>Department of Paediatric Pulmonology, Allergy and Neonatology, Hannover Medical School, 30625 Hannover, Germany

<sup>6</sup>Institute for Pathology, Hannover Medical School, 30625 Hannover, Germany

<sup>7</sup>Institute for Experimental Infection Research, TWINCORE, Centre for Experimental and Clinical Infection Research, A Joint Venture between the Helmholtz Centre for Infection Research and the Hannover Medical School, 30625 Hannover, Germany

<sup>8</sup>Fraunhofer Institute for Toxicology and Experimental Medicine, 30625 Hannover, Germany

<sup>9</sup>Institute for Microbiology, University of Veterinary Medicine Hannover, 30559 Hannover, Germany

<sup>10</sup>Division of Hematology/Oncology, Boston Children's Hospital, 02115 Boston, MA, USA

<sup>11</sup>Department of Pediatrics, University Clinic Carl Gustav Carus, 01307 Dresden, Germany

<sup>12</sup>Present address: San Raffaele Telethon Institute for Gene Therapy (TIGET), Scientific Institute HS Raffaele, 20129 Milan, Italy

<sup>13</sup>Co-first author

\*Correspondence: [lachmann.nico@mh-hannover.de](mailto:lachmann.nico@mh-hannover.de)

<https://doi.org/10.1016/j.stemcr.2017.11.011>

### SUMMARY

Mendelian susceptibility to mycobacterial disease (MSMD) is caused by inborn errors of interferon gamma (IFN $\gamma$ ) immunity and is characterized by severe infections by weakly virulent mycobacteria. Although IFN $\gamma$  is the macrophage-activating factor, macrophages from these patients have never been studied. We demonstrate the generation of heterozygous and compound heterozygous (iMSMD-cohet) induced pluripotent stem cells (iPSCs) from a single chimeric patient, who suffered from complete autosomal recessive IFN $\gamma$ RI deficiency and received bone-marrow transplantation. Loss of IFN $\gamma$ RI expression had no influence on the macrophage differentiation potential of patient-specific iPSCs. In contrast, lack of IFN $\gamma$ RI in iMSMD-cohet macrophages abolished IFN $\gamma$ -dependent phosphorylation of STAT1 and induction of IFN $\gamma$ -downstream targets such as *IRF-1*, *SOCS-3*, and *IDO*. As a consequence, iMSMD-cohet macrophages show impaired upregulation of HLA-DR and reduced intracellular killing of *Bacillus Calmette-Guérin*. We provide a disease-modeling platform that might be suited to investigate novel treatment options for MSMD and to gain insights into IFN $\gamma$  signaling in macrophages.

### INTRODUCTION

Since their discovery in 2006, induced pluripotent stem cells (iPSCs) have been considered an invaluable tool for drug testing, disease modeling, and regenerative therapies (Yamanaka and Takahashi, 2006). Nowadays, iPSCs can be generated from different sources of patient material and subsequently be differentiated into the affected cell types to study the underlying disease pathophysiology and to develop new forms of treatment. The feasibility of this approach has been highlighted for different cell types of the three germ layers. Similarly, mesodermal differentiation of iPSCs toward different cells of the hematopoietic lineage has been successfully proven (Ackermann et al., 2015). Generation of macrophages from patient-derived iPSCs is of particular interest (Lachmann et al., 2014; Mucci et al., 2016), as these cells play an important role in tissue homeostasis and innate immunity (Ginhoux et al., 2016). In this context, impairment of macrophage functionality

due to genetic predisposition or environmental factors can lead to severe and life-threatening infections, as seen in Mendelian susceptibility to mycobacterial disease (MSMD).

MSMD is a rare primary immunodeficiency characterized by clinical infections caused by weakly virulent mycobacteria in otherwise healthy individuals. Most MSMD patients suffer from severe infections triggered by *Mycobacterium bovis* *Bacillus Calmette-Guérin* (BCG), which has been used as an attenuated vaccine for tuberculosis (Bustamante et al., 2014). Up to now, genetic defects in eight autosomal (*IFNGR1*, *IFNGR2*, *STAT1*, *IRF8*, *ISG15*, *TYK2*, *IL12B*, and *IL12RB1*) and two X-linked (*CYBB* and *NEMO*) genes, all controlling interferon gamma (IFN $\gamma$ ) immunity, have been identified in MSMD patients (Al-Muhsen and Casanova, 2008). Mutations in the different genes mainly affect the IFN $\gamma$ -signaling pathway, resulting in impaired activation of macrophages by T or natural killer (NK) cells (Bustamante et al., 2014; Chapman and Hill, 2012).

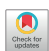

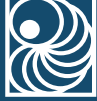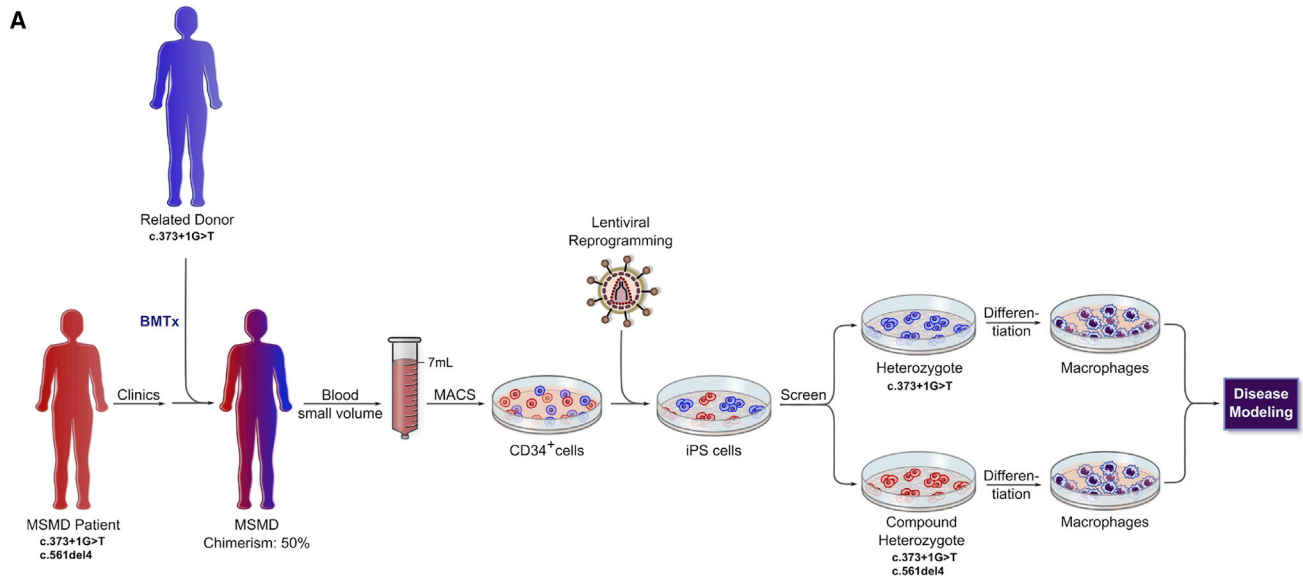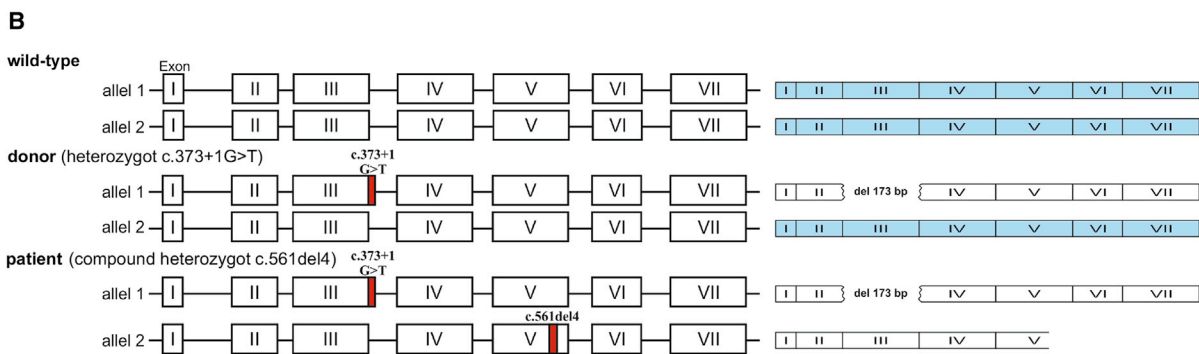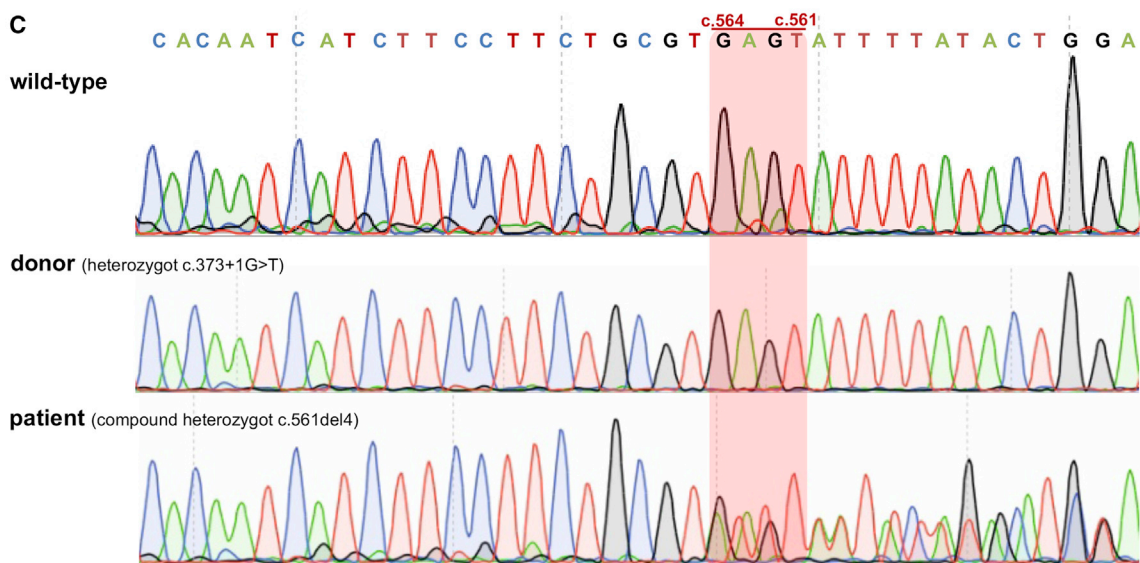

(legend on next page)

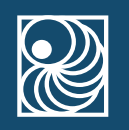

The current form of treatment for MSMD patients consists of antibiotics in combination with IFN $\gamma$  therapy to restore the function of macrophages. However, patients suffering from complete autosomal recessive IFN $\gamma$ R1 (OMIM no.209950) or IFN $\gamma$ R2 (OMIM no. 614889) deficiency receive hematopoietic stem cell transplantation (HSCT) as the only curative treatment (Chantrain et al., 2006; Horwitz et al., 2003; Olbrich et al., 2015; Reuter et al., 2002; Roesler et al., 2004). Although this therapy has been proven effective in some cases, further complications caused by the impaired functionality of macrophages, such as recurrent infections and high serum levels of IFN $\gamma$ , hamper the overall success of this approach. Especially the latter is of high clinical relevance, as a high serum level of IFN $\gamma$  directly interferes with donor hematopoietic stem cell (HSC) proliferation and consequently leads to graft rejection (Rottman et al., 2008).

Given the limited amount of patient material available and the unsatisfactory long-term treatment alternatives for IFN $\gamma$ R1 or IFN $\gamma$ R2 deficiency, we established a disease-modeling platform for IFN $\gamma$ R1 deficiency using iPSC-derived macrophages. In our study, we generated patient-specific iPSCs from a small volume of peripheral blood from one patient suffering from complete autosomal recessive IFN $\gamma$ R1 deficiency caused by a compound heterozygous mutation in *IFN $\gamma$ R1* who had previously received HSCT from a sibling harboring a heterozygous mutation in *IFN $\gamma$ R1*. Patient-specific macrophages, which are derived from compound heterozygous iPSCs, showed impaired IFN $\gamma$ -mediated signaling and functionality, thus underlining their suitability to evaluate new therapeutic interventions or to study mycobacterial infections.

## RESULTS

### Heterozygous and Compound Heterozygous IFN $\gamma$ R1-Deficient iPSC Lines Derived from a Single Chimeric MSMD Patient

In order to establish a disease-modeling platform for MSMD, we first isolated peripheral blood from a patient with MSMD due to complete autosomal recessive IFN $\gamma$ R1

deficiency (Roesler et al., 1999) (Figure 1A). The patient suffered mainly from disseminated infections caused by several mycobacteria such as *M. avium*, *M. kansasii*, and BCG affecting several organs such as lymph nodes, lungs, and bones. These infections led to episodes of fever and enhanced serum parameters indicating chronic inflammation. Liver cirrhosis and meningitis caused by *Listeria monocytogenes* were also observed. The patient received an HSCT from her older sister with whom she shared a mutated allele (c.373+1G > T) (Figures 1A and 1B). This mutation is based on a G to T transition at position 1 in the 5' end of intron III and results in the skipping of the entire exon III, as described previously (Roesler et al., 1999). After an initial 100% donor chimerism, the donor cells declined to roughly 50%, which was prompted by donor lymphocyte transfusions. These transfusions stabilized the chimerism at 50%–60% and the patient substantially improved clinically (Reuter et al., 2002).

After isolation of CD34<sup>+</sup> cells from 7 mL of peripheral blood (EDTA), a “4 in 1” all-in-one lentiviral vector harboring the classical Yamanaka factors was used for reprogramming (Figure 1A). Within 10–20 days post transduction, 23 iPSC clones could be successfully established and have been subjected to further genotypic analysis. To discriminate compound heterozygous patient-specific iPSC clones from heterozygous donor cells, we performed sequencing of exon V in the *IFN $\gamma$ R1* gene locus. The 4 bp deletion between nucleotides 561 and 564 in exon V leads to a frameshift mutation creating a premature stop codon 42 bp downstream of amino acid 187 (Roesler et al., 1999) (Figure 1B). Analysis of exon V revealed nine clones positive for the patient-specific 4 bp deletion at c561 (c.561del4), whereas the remaining 14 iPSC clones showed a wild-type sequence around c.561, proving their donor-specific origin (Figure 1C). Further genotypic analysis by semi-qPCR revealed the presence of the heterozygous mutation in the splice consensus sequence at position c.373 in exon III in all 23 iPSC clones analyzed (Figure S1A). After identification of donor- and patient-specific iPSCs, we established two heterozygous (iMSMD-het.4 or .9) and three compound heterozygous iPSC clones (iMSMD-cohet.7, .5, or .17) for further analysis. Irrespective of their

### Figure 1. Generation of Heterozygous and Compound Heterozygous IFN $\gamma$ R1-Deficient iPSCs

- (A) Schematic view of the generation, characterization, and hematopoietic differentiation of MSMD patient-derived iPSCs.  
(B) Illustrative scheme of the *IFN $\gamma$ R1* genomic DNA and transcribed mRNA in healthy wild-type individuals, the heterozygous donor, and the compound heterozygous MSMD patient. The heterozygous donor harbors a G > T transition at nucleotide position 373, which leads to the skipping of the entire exon III. The compound heterozygous patient carries the same mutation and has a deletion of 4 base pairs (bp) in the second *IFN $\gamma$ R1* allele, which results in a frameshift mutation and a premature stop codon 42 bp downstream of the deletion at position c.561.  
(C) Sequencing and electropherogram to screen for the patient-specific 4 bp deletion in exon V in different iPSCs. Sequencing was performed on healthy wild-type iPSCs (hCD34-iPSC16) and heterozygous and compound heterozygous patient-specific iPSCs. See also Figure S1.

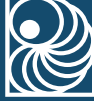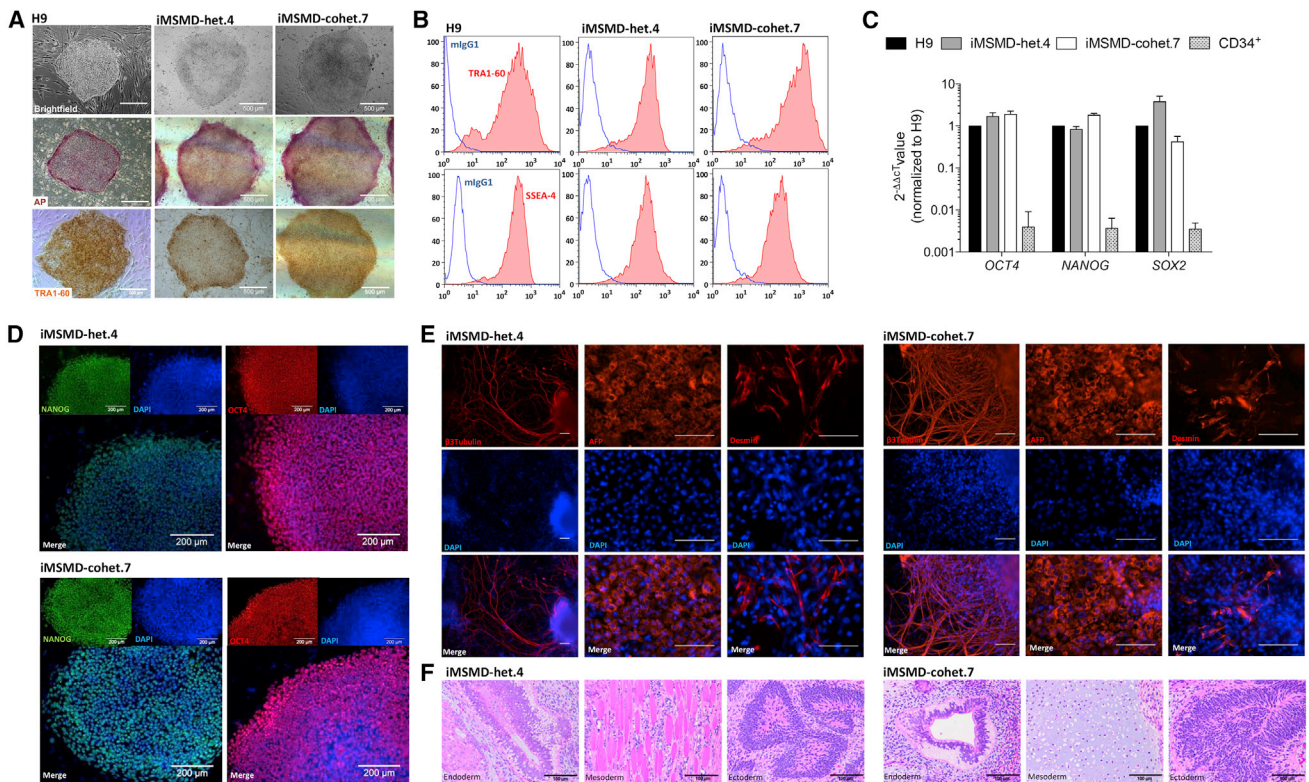

**Figure 2. Generation and Characterization of Different Patient-Specific MSMD iPSC Lines**

(A) Microscopic analysis of iPSC lines derived either from heterozygous donor (iMSMD-het.4) or compound heterozygous donor (iMSMD-cohet.7) cells. The first row shows bright-field images of a human embryonic stem cell line (H9), iMSMD-het.4, and iMSMD-cohet.7. Alkaline phosphatase (AP) staining or immunohistochemistry staining for TRA1-60 is shown in the second and third row, respectively (scale bar, 500  $\mu$ m).

(B) Flow-cytometric analysis of TRA1-60 (first row) and SSEA4 (second row) expression on iMSMD-het.4 and iMSMD-cohet.7 (blue line, isotype; red filled line, surface marker).

(C) qRT-PCR to evaluate endogenous expression of *OCT4*, *NANOG*, and *SOX2* in MSMD iPSCs relative to H9 control cells (n = 4 independent experiments; mean  $\pm$  SEM).

(D) Immunofluorescent staining of pluripotency-associated transcription factors for NANOG (green) and OCT4 (red) (scale bar, 200  $\mu$ m).

(E) Immunofluorescent staining of iMSMD-het.4 and iMSMD-cohet.7 iPSC derivatives on day 20 of undirected differentiation (first row represents staining performed for  $\beta$ 3-tubulin,  $\alpha$ -fetoprotein (AFP), and desmin (red); second row represents DAPI staining; and third row represents overlay images; scale bar, 100  $\mu$ m).

(F) Representative H&E staining of teratoma formation after transplantation of iMSMD-het.4 (endoderm, epithelium lining a luminal surface; mesoderm, muscle fibers; or ectoderm, immature neuroepithelium) or iMSMD-cohet.7 (endoderm, epithelium lining a luminal surface; mesoderm, cartilage; or ectoderm, immature neuroepithelium) cells into immunocompromised NSGS mice (scale bar, 100  $\mu$ m).

See also [Figure S2](#).

origin, the iMSMD-het.4 and iMSMD-cohet.7 clones showed typical iPSC morphology in bright-field images and stained positive for alkaline phosphatase activity and TRA1-60 expression, which was similar to the human embryonic stem cell line H9 (Figure 2A). Moreover, both MSMD lines had similar surface marker expression of SSEA4 as well as TRA1-60 and showed reactivation of endogenous *OCT4*, *NANOG*, and *SOX2* expression (Figures 2B–2D). Pluripotency was also proven by their ability to differentiate toward cells of the three germ layers, which was analyzed by immunofluorescence staining of

$\beta$ 3-tubulin (ectoderm),  $\alpha$ -fetoprotein (AFP) (endoderm), and desmin (mesoderm) (Figure 2E). Three-lineage differentiation potential was also proven in teratoma assays. Here, injection of iMSMD-het.4 and iMSMD-cohet.7 clones into immunocompromised NSGS mice led to the formation of cells derived from either endoderm (epithelium lining a luminal surface), mesoderm (muscle fibers or cartilage), or ectoderm (immature neuroepithelium) lineages (Figure 2F). Similarly, the iMSMD-het.9, iMSMD-cohet.5, and iMSMD-cohet.17 iPSC lines also fulfilled the aforementioned criteria for pluripotency (Figures S2A–S2E).

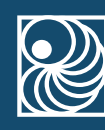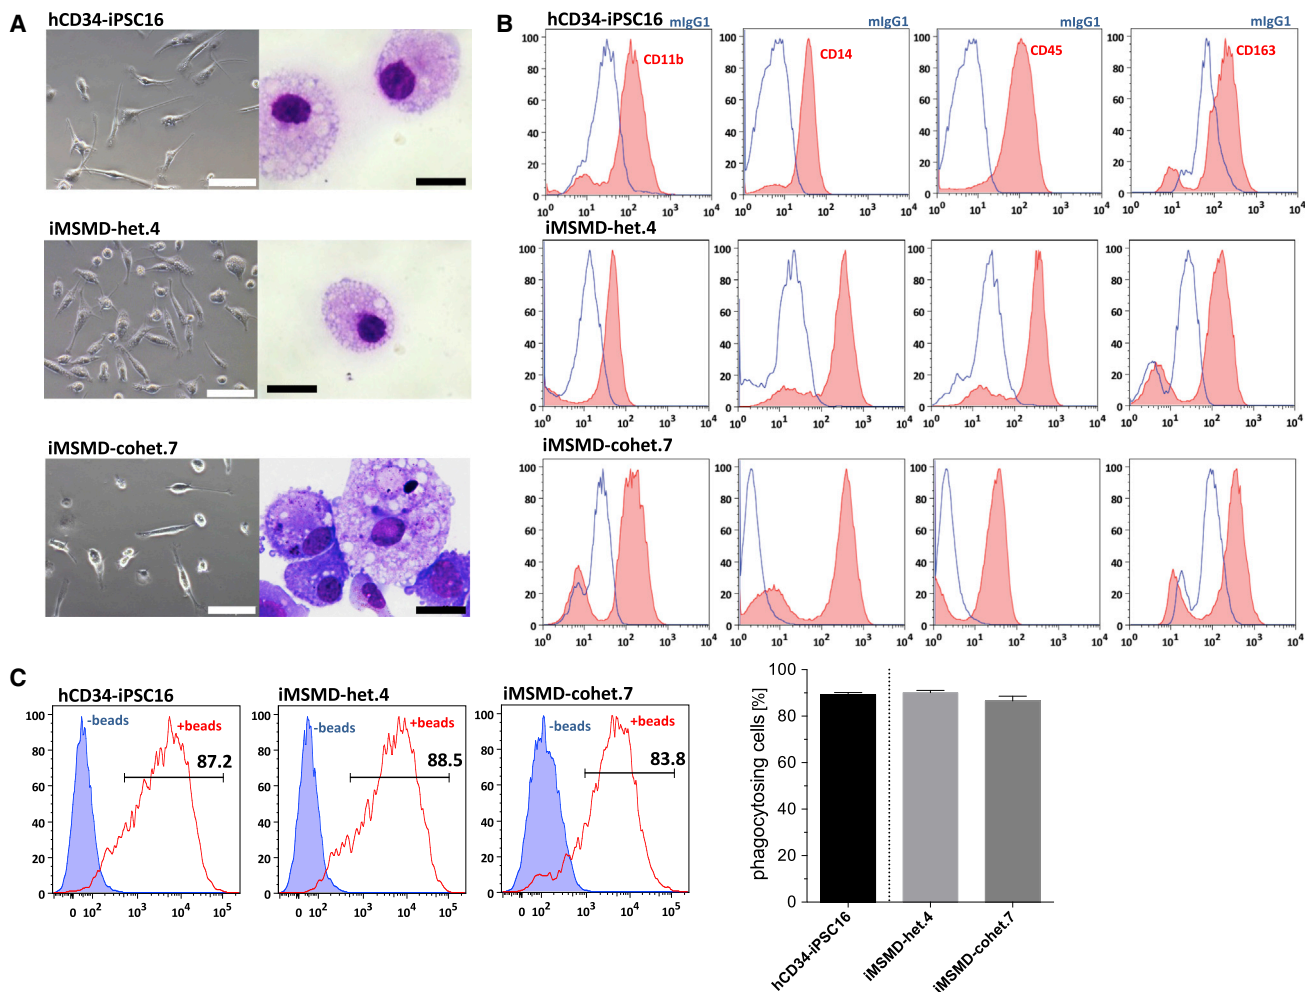

### Figure 3. Hematopoietic Differentiation of iMSMD Lines

Heterozygous (iMSMD-het.4) and compound heterozygous (iMSMD-cohet.7) iPSC lines have been differentiated toward macrophages and compared with healthy iPSC-derived macrophages (hCD34-iPSC16).

(A) Microscopic analysis of macrophages in bright-field images (left; scale bar, 100  $\mu$ m) or cytospin images (right; scale bar, 20  $\mu$ m) generated from iMSMD-het.4, iMSMD-cohet.7, or the control line hCD34-iPSC16.

(B) Surface marker expression evaluated by flow cytometry of CD11b, CD14, CD45, and CD163 macrophages derived from iMSMD-het.4, iMSMD-cohet.7, or the control line hCD34-iPSC16 (blue line, isotype; red filled line, surface marker).

(C) Ability of iPSC-derived macrophages to phagocytose latex beads. Left images show representative flow-cytometric analysis of macrophages (blue filled line, cells without beads; red line, cells beads). Right image shows macrophages that are positive for fluorescent latex beads ( $n = 4$  independent experiments; mean  $\pm$  SEM).

See also [Figure S3](#).

### Hematopoietic Differentiation of IFN $\gamma$ R1-Deficient iPSCs toward Macrophages

In order to study IFN $\gamma$ -mediated signaling effects in patient- or donor-specific iPSC-derived macrophages, we subjected the established iPSC lines to a previously published hematopoietic differentiation protocol (Lachmann et al., 2015). Early hematopoietic specification of iMSMD-het.4 and iMSMD-cohet.7 iPSC lines resulted in the formation of myeloid-cell-forming complexes (MCFCs) within 10 days of differentiation. From day 10–15 onward,

MCFCs derived from iMSMD-het.4 and iMSMD-cohet.7 iPSCs continuously produced macrophages, which could be harvested weekly in comparable quantities. After terminal differentiation, macrophages from both sources showed typical morphology in bright-field and cytospin images compared with healthy iPSC-derived macrophages (Figure 3A). Of note, throughout our studies we used the previously generated and characterized iPSC control line hCD34-iPSC16 (Ackermann et al., 2014; Lachmann et al., 2014, 2015). Detailed characterization of

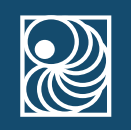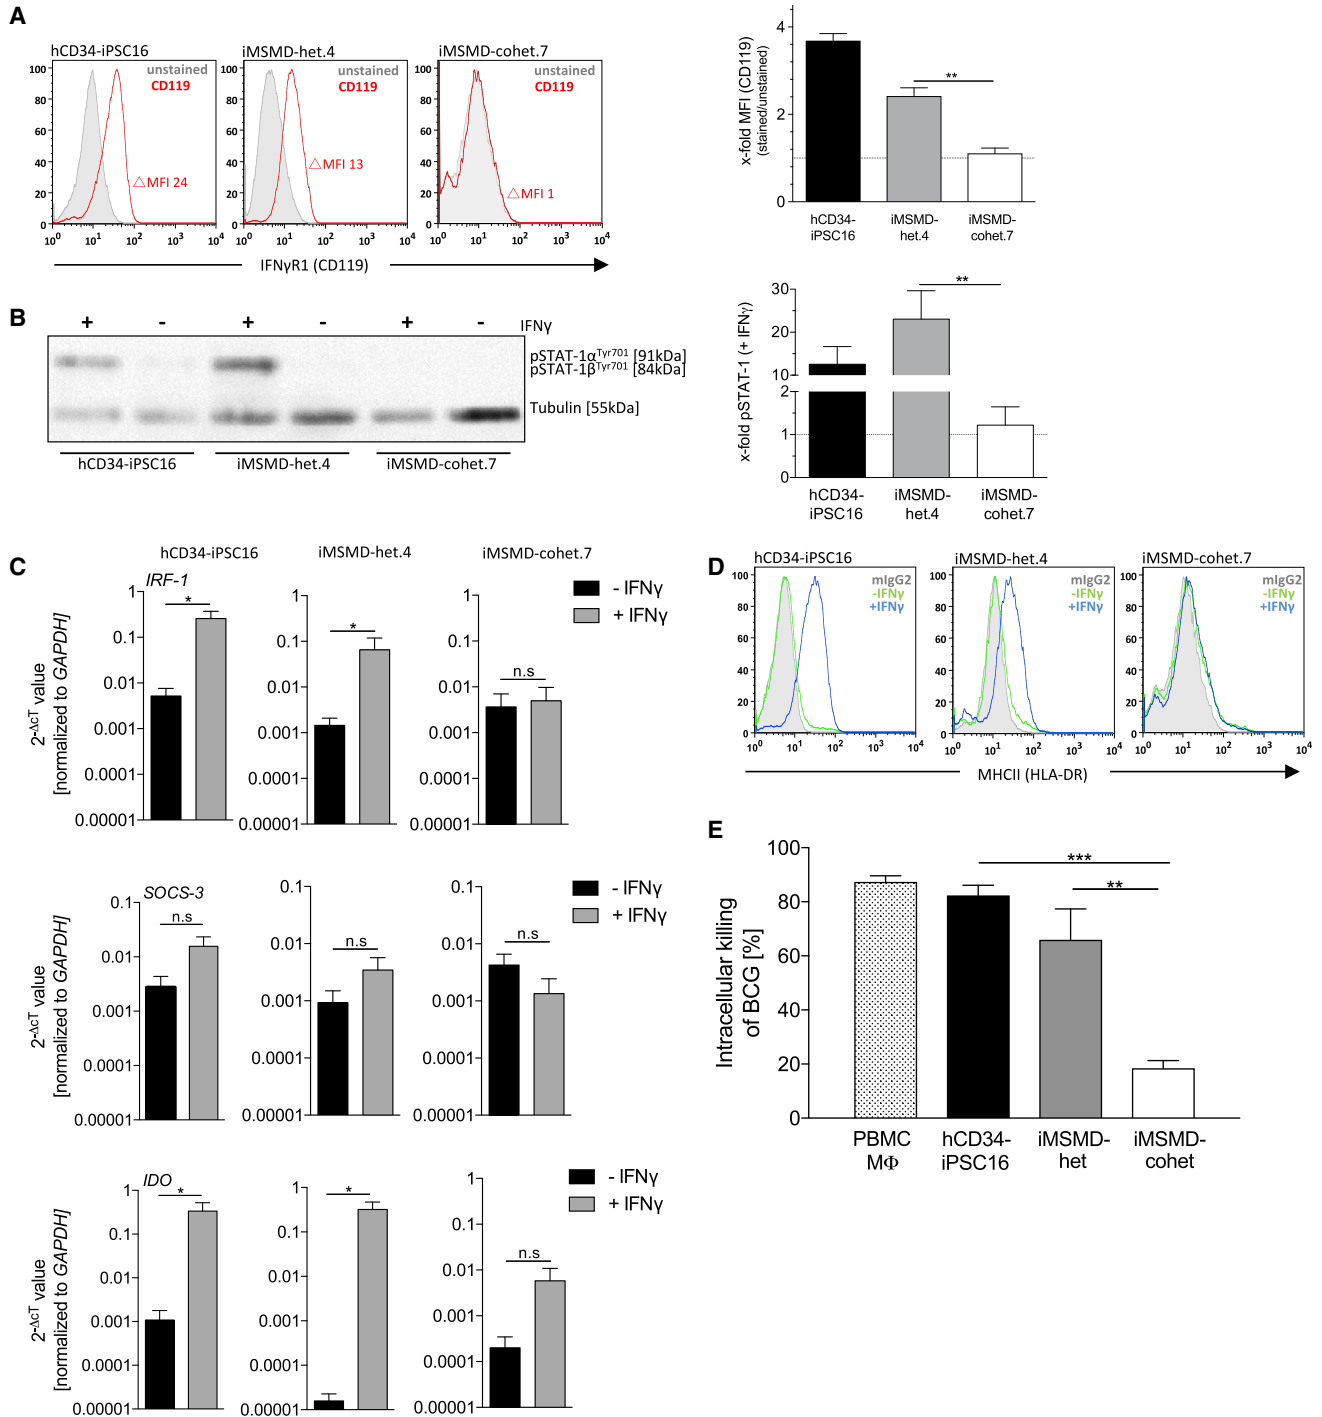

**Figure 4. Impaired IFN $\gamma$  Signaling and Functionality in iMSMD-Derived Macrophages**

(A) Left images show representative flow-cytometric analysis of IFN $\gamma$ R1 (CD119) surface marker expression by flow cytometry on iMSMD- and hCD34-iPSC16-derived macrophages (gray filled line, unstained; red line, CD119). Right images show delta mean fluorescent intensity (MFI) of CD119 expression (delta MFI was calculated by subtracting unstained [negative] MFI from CD119 [positive] MFI) relative to unstained control (n = 3 independent experiments; mean  $\pm$  SEM; \*\*p < 0.01 by one-way ANOVA).

(legend continued on next page)

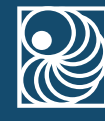

macrophages revealed a surface marker expression profile of CD11b<sup>+</sup>CD14<sup>+</sup>CD45<sup>+</sup>CD163<sup>+</sup> similar to that of healthy iPSC-derived cells (Figure 3B). Moreover, macrophages from compound heterozygous or heterozygous iPSC clones displayed normal functional behavior with respect to phagocytosis of latex beads (Figure 3C). Similar observations were made when iMSMD-het.9 as well as iMSMD-cohet.5 or .17 were subjected to the macrophage generation protocol. iMSMD-derived macrophages showed typical morphology, surface marker expression profile, and the ability to phagocyte latex beads, indicating that the genetic background of our patient-specific iPSCs had no influence on the generation and differentiation potential toward macrophages (Figures S3A–S3C).

### IFN $\gamma$ R1-Deficient Macrophages Show Impaired IFN $\gamma$ Signaling and Functionality

As a next step, we investigated the phenotypic consequence of IFN $\gamma$ R1 deficiency in terminally differentiated macrophages derived from healthy, iMSMD-het, or iMSMD-cohet iPSCs. Flow-cytometric analysis of IFN $\gamma$ R1 (CD119) revealed the absence of the receptor on macrophages derived from all iMSMD-cohet clones, whereas expression could be observed in healthy cells or macrophages harboring the heterozygous c.373+1G > T frameshift mutation only (Figures 4A and S4A). Of note, no change in delta mean fluorescent intensity of CD119 could be observed between macrophages derived from heterozygous iMSMD or healthy iPSCs (Figure 4A). In order to study the loss of IFN $\gamma$ R1, we next stimulated iPSC-derived macrophages with IFN $\gamma$  and analyzed the downstream signaling pathway. Due to the absence of IFN $\gamma$ R1, macrophages derived from iMSMD-cohet.7, iMSMD-cohet.5, or iMSMD-cohet.17 iPSCs were not able to phosphorylate STAT1 in the presence of IFN $\gamma$ . In contrast, macrophages derived from healthy, iMSMD-het.4, or iMSMD-het.9 iPSCs showed significant phosphorylation of STAT1 after stimulation with IFN $\gamma$

(Figures 4B and S4B). Of note, background phosphorylation of STAT1 could be observed in some of the experiments, which could be explained by the residual presence of and activation by M-CSF (Novak et al., 1995) (Figure S4B). As a consequence of defective IFN $\gamma$ -mediated downstream signaling, macrophages from iMSMD-cohet.7 and iMSMD-cohet.5 showed impaired upregulation of known IFN $\gamma$  targets such as interferon regulatory factor 1 (*IRF-1*), suppressor of cytokine signaling 3 (*SOCS-3*), or indoleamine-2,3-dioxygenase (*IDO*). In contrast, macrophages derived from healthy or iMSMD-het.4 iPSCs were able to induce expression of *IRF-1*, *SOCS-3*, and *IDO*, after stimulation with IFN $\gamma$  (Figures 4C and S4C). A similar effect could be observed for the surface marker expression of MHC-class II (HLA-DR). Here, stimulation of cells with IFN $\gamma$  led to the upregulation of HLA-DR on healthy, iMSMD-het.4, and iMSMD-het.9 macrophages, whereas macrophages derived from either iMSMD-cohet.7, iMSMD-cohet.5, or iMSMD-cohet.17 iPSCs showed no upregulation of HLA-DR after stimulation with IFN $\gamma$  (Figures 4D and S4D). As a consequence of impaired IFN $\gamma$  signaling, patients suffering from MSMD frequently show disseminated infections by weakly virulent mycobacteria such as non-tuberculous environmental mycobacteria or BCG vaccine. Moreover, MSMD patients are also prone to infections triggered by more virulent *Mycobacterium tuberculosis*, as well as non-typhoidal *Salmonella* spp. Thus, as a final assessment of IFN $\gamma$ -mediated functionality, we studied the ability of iPSC-derived macrophages to intracellularly clear BCG. To this end, we challenged our iPSC-derived macrophages with BCG in the presence of IFN $\gamma$  and compared the intracellular killing of iMSMD-het and iMSMD-cohet macrophages with macrophages derived from healthy hCD34-iPSC16 or macrophages derived from peripheral blood mononuclear cells (PBMCs). As expected, macrophages derived from iMSMD-cohet iPSCs showed only 20% intracellular killing activity of BCG, whereas healthy macrophages derived either from PBMC, hCD34-iPSC16,

(B) Analysis of STAT1 phosphorylation (pSTAT1) in macrophage subsets stimulated with IFN $\gamma$ . Left image shows western blot analysis of pSTAT1 (approx. 90 kDa) in iMSMD- and hCD34-iPSC16-derived macrophages (tubulin [50 kDa] served as a control). Right image shows densitometry of pSTAT1 relative to unstimulated control (n = 5 independent experiments; mean  $\pm$  SEM; \*\*p < 0.01 by one-way ANOVA).

(C) qRT-PCR of *IRF-1* (first row), *SOCS-3* (second row), and *IDO* (third row) in iMSMD- and hCD34-iPSC16-derived macrophages after stimulation with IFN $\gamma$ . Values are normalized to *GAPDH* as a housekeeping gene (n = 3 independent experiments; mean  $\pm$  SEM; \*p < 0.05 by unpaired, two-tailed Students' t test; n.s., not significant).

(D) Flow-cytometric analysis of MHC-II (HLA-DR) surface marker expression by flow cytometry on iMSMD- and hCD34-iPSC16-derived macrophages before (–IFN $\gamma$ ) and after stimulation (+IFN $\gamma$ ) with IFN $\gamma$  (gray filled line, isotype; green line, non-stimulated control; blue line, IFN $\gamma$  stimulated).

(E) Intracellular killing of *Bacillus Calmette-Guérin* (BCG) in iMSMD- and hCD34-iPSC16-derived macrophages. PBMC-derived macrophages were used as additional control. Intracellular killing of BCG is given as a percentage, calculated to the initial time point analyzed (1–24 hr time point). The ability of mycobacterial killing was evaluated by plating a macrophage cell suspension on Middlebrook 7H10 agar plates (n = 4 independent experiments, iMSMD-het (.4 and .9); iMSMD-cohet (.7 and .17); mean  $\pm$  SEM; \*\*p < 0.01, \*\*\*p < 0.001 by one-way ANOVA).

See also Figure S4.

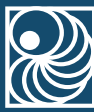

or iMSMD-het could clear around 85%, 80%, and 70% of intracellular BCG, respectively (Figure 4E).

## DISCUSSION

In the present study, we established an iPSC-based disease-modeling platform for MSMD, which is based on an autosomal recessive, complete IFN $\gamma$ R1 deficiency. This is of high clinical relevance as current forms of treatment for patients suffering from either IFN $\gamma$ R1 or IFN $\gamma$ R2 deficiency are limited (Chantrain et al., 2006; Horwitz et al., 2003; Olbrich et al., 2015). Moreover, this study has also profound biological relevance, as the impact of IFN $\gamma$ R1 deficiency had never been studied in the main target cell of IFN $\gamma$ , namely macrophages. Indeed, IFN $\gamma$  is first and foremost a macrophage-activating-factor. Thus, we established patient-specific iPSCs from a single MSMD patient, who previously received HSCT from a healthy family member carrying a heterozygous mutation in *IFN $\gamma$ R1* (Reuter et al., 2002; Roesler et al., 1999). Lentiviral vector-based reprogramming resulted in iPSC colonies within 15–20 days post transduction. Genotypic screening of iPSC clones revealed a colony subset of 40%, which were derived from compound heterozygous patient cells. This observation is similar to the patient's blood chimerism of approx. 50% at the time of reprogramming, demonstrating that loss of IFN $\gamma$ R1 had no detrimental effects on the reprogramming process. Of note, IFN $\gamma$  has been proven to directly interfere with long-term repopulating HSCs and to induce proliferation in these cells (Baldrige et al., 2010; Rottman et al., 2008). While we enriched CD34<sup>+</sup> cells for reprogramming, it remains to be elucidated whether the discrepancy of 10% in the patient blood chimera is of biological relevance in our system.

After establishing donor- and patient-specific iPSCs, we subjected the different clones to a hematopoietic differentiation protocol to generate macrophages. Here, irrespective of their genetic background, generation and IFN $\gamma$  independent functionalities of iPSC-derived macrophages revealed no abnormalities. In contrast, stimulation of iMSMD-cohet macrophages with IFN $\gamma$  revealed deregulated STAT1 downstream signaling, which was associated with impaired breakdown of mycobacteria. Especially the latter is of high interest, as MSMD patients suffer from severe and/or recurrent infections. In our study, we used BCG, a live attenuated strain of *M. bovis*, which is used as a vaccine against *M. tuberculosis* (Colditz et al., 1994). While BCG and other environmental mycobacteria are the most common pathogens in the context of IFN $\gamma$ R1 deficiency, MSMD patients are also vulnerable to other pathogens such as *M. tuberculosis*, *Salmonella* spp., or *Listeria monocytogenes* (Al-Muhsen and Casanova, 2008; Bustamante et al.,

2014). Whether or not these co-infections are directly linked to the IFN $\gamma$ R1 defect is still questionable and could be addressed using our established disease-modeling platform. However, here more advanced differentiation systems would be favorable in order to study the complex role of IFN $\gamma$  in both innate and adaptive immunity. iPSC-based differentiation systems that are able to generate B, T, or NK cells (Ackermann et al., 2015; French et al., 2015; Sturgeon et al., 2014) may be employed and could be combined with iPSC-derived macrophages to study the crosstalk between different immune cells in an autologous setting. Using this approach, other MSMD-causing mutations could also be investigated. Thus, iPSC-derived macrophages could be used to gain new insights into deficiencies due to mutations in *IFN $\gamma$ R2*, *STAT1*, *NEMO*, *IRF8*, or *CYBB*, whereas iPSC-derived lymphocytes could be used to study functional defects due to *IL12RB1* deficiency. In addition, genome editing tools such as CRISPR/Cas9 could be used in order to correct the disease-causing mutation or to perform further loss-of-function studies on an isogenic background (Casanova et al., 2014). This being said, targeted disruption of *IRF8* by CRISPR/Cas9 genome editing in iPSCs has been used to study the development of dendritic cells (Sontag et al., 2017). These genetically modified iPSCs and their isogenic controls could also be used to study the effect of IFN $\gamma$  signaling in the context of MSMD.

Taken together, we provide a disease-modeling platform for MSMD due to complete IFN $\gamma$ R1 deficiency. Considering the importance of IFN $\gamma$  signaling throughout the hematopoietic system, the established iPSC lines could be used as a screening platform to investigate new forms of treatment for MSMD. Moreover, our iPSC disease-modeling platform might also have broader applicability and may also be used to study the biology and treatment options for other mycobacterial infections, such as tuberculosis.

## EXPERIMENTAL PROCEDURES

Human peripheral blood samples were collected after written informed consent of the donor at Universitätsklinikum Dresden (Germany). Ethical vote no. 2127-2014 was approved by the Institutional Ethical Committee at Hannover Medical School (Hannover, Germany).

Work related to the human ESC-line H9 was approved by the Robert Koch Institut (No: 1710-79-1-4-81).

### Hematopoietic Differentiation of iPSCs toward Monocytes and Macrophages

iPSC-derived macrophages were generated using a modified version of the previously established embryoid body (EB)-based hematopoietic protocol (Lachmann et al., 2014, 2015). iPSCs were disrupted by collagenase V and transferred into six-well suspension plates for EB formation in embryonic stem cell medium without





basic fibroblast growth factor and 10  $\mu$ M Rock inhibitor (Y-27632; Tocris, Bristol, UK) for 5 days on a rotator shaker (85 rpm). Thereafter, myeloid-cell-forming complex formation was performed in the presence of X-Vivo15 medium (Lonza, Hessisch Oldendorf, Germany) supplemented with 2 mM L-glutamine, 1% penicillin/streptomycin (PS), 50 ng/mL human macrophage colony stimulating factor (hM-CSF), and 25 ng/mL human interleukin 3 (Preprotech). The macrophages generated were harvested once a week and filtered through a 100  $\mu$ M mesh. Harvested cells were cultured in RPMI1640 supplemented with 10% fetal calf serum, 2 mM L-glutamine, 1% PS, and 50 ng/mL hM-CSF.

Additional experimental procedures are provided in [Supplemental Experimental Procedures](#).

## SUPPLEMENTAL INFORMATION

Supplemental Information includes Supplemental Experimental Procedures and four figures and can be found with this article online at <https://doi.org/10.1016/j.stemcr.2017.11.011>.

## AUTHOR CONTRIBUTIONS

A.-L.N., J.L., and N.L. designed the study and performed experiments. K.H., S.M., N.S., A.M., M.A., M.S., C.H., M.P.K., R.G., P.B., F.P., and D.J. performed experiments and analyzed data. J.R. provided patient material and discussed the results. U.M., U.B., U.K., and A.S. provided conceptual advice and discussed the results. All authors contributed to manuscript preparation and approved the final version of the manuscript.

## ACKNOWLEDGMENTS

The authors thank Doreen Lüttge and Theresa Buchegger (both Hannover Medical School) and Kristin Laarmann (Stiftung Tierärztliche Hochschule Hannover) for excellent technical assistance. We would like to thank Juliane Wilhelmine Shott (Hannover Medical School) for preparing conceptual schemes. The authors would also like to thank Jean-Laurent Casanova (Howard Hughes Medical Institute, The Rockefeller University, and Necker Hospital for Sick Children, Paris) and Jacinta Bustamante (Necker Hospital for Sick Children, Paris) for critical comments and proofreading of the manuscript. This work was supported by grants from the Deutsche Forschungsgemeinschaft (Cluster of Excellence REBIRTH; Exc 62/1 to N.L., U.M., and A.S. as well as DFG LA 3680/2-1, Sonderforschungsbereich SFB738 to A.S.), the Else Kröner-Fresenius-Stiftung (EKFS; 2015\_A92 to N.L.), the German Center for Lung Research (DZL; 82DZL00201), the Joachim Herz Stiftung (N.L.), and MH-Hannover (“Young Academy” program to N.L.).

Received: April 6, 2017

Revised: November 15, 2017

Accepted: November 15, 2017

Published: December 14, 2017

## REFERENCES

Ackermann, M., Lachmann, N., Hartung, S., Eggenschwiler, R., Pfaff, N., Happle, C., Mucci, A., Gohring, G., Niemann, H., Hansen,

G., et al. (2014). Promoter and lineage independent anti-silencing activity of the A2 ubiquitous chromatin opening element for optimized human pluripotent stem cell-based gene therapy. *Biomaterials* 35, 1531–1542.

Ackermann, M., Liebhaber, S., Klusmann, J.H., and Lachmann, N. (2015). Lost in translation: pluripotent stem cell-derived hematopoiesis. *EMBO Mol. Med.* 7, 1388–1402.

Al-Muhsen, S., and Casanova, J.L. (2008). The genetic heterogeneity of mendelian susceptibility to mycobacterial diseases. *J. Allergy Clin. Immunol.* 122, 1043–1051, quiz 1052–1043.

Baldrige, M.T., King, K.Y., Boles, N.C., Weksberg, D.C., and Goodell, M.A. (2010). Quiescent haematopoietic stem cells are activated by IFN-gamma in response to chronic infection. *Nature* 465, 793–797.

Bustamante, J., Boisson-Dupuis, S., Abel, L., and Casanova, J.L. (2014). Mendelian susceptibility to mycobacterial disease: genetic, immunological, and clinical features of inborn errors of IFN-gamma immunity. *Semin. Immunol.* 26, 454–470.

Casanova, J.L., Conley, M.E., Seligman, S.J., Abel, L., and Notarangelo, L.D. (2014). Guidelines for genetic studies in single patients: lessons from primary immunodeficiencies. *J. Exp. Med.* 211, 2137–2149.

Chantraine, C.F., Bruwier, A., Brichard, B., Largent, V., Chapgier, A., Feinberg, J., Casanova, J.L., Stalens, J.P., and Vermynen, C. (2006). Successful hematopoietic stem cell transplantation in a child with active disseminated *Mycobacterium fortuitum* infection and interferon-gamma receptor 1 deficiency. *Bone Marrow Transplant.* 38, 75–76.

Chapman, S.J., and Hill, A.V. (2012). Human genetic susceptibility to infectious disease. *Nat. Rev. Genet.* 13, 175–188.

Colditz, G.A., Brewer, T.F., Berkey, C.S., Wilson, M.E., Burdick, E., Fineberg, H.V., and Mosteller, F. (1994). Efficacy of BCG vaccine in the prevention of tuberculosis. Meta-analysis of the published literature. *JAMA* 271, 698–702.

French, A., Yang, C.T., Taylor, S., Watt, S.M., and Carpenter, L. (2015). Human induced pluripotent stem cell-derived B lymphocytes express sIgM and can be generated via a hemogenic endothelium intermediate. *Stem Cells Dev.* 24, 1082–1095.

Ginhoux, F., Schultze, J.L., Murray, P.J., Ochando, J., and Biswas, S.K. (2016). New insights into the multidimensional concept of macrophage ontogeny, activation and function. *Nat. Immunol.* 17, 34–40.

Horwitz, M.E., Uzel, G., Linton, G.F., Miller, J.A., Brown, M.R., Malach, H.L., and Holland, S.M. (2003). Persistent *Mycobacterium avium* infection following nonmyeloablative allogeneic peripheral blood stem cell transplantation for interferon-gamma receptor-1 deficiency. *Blood* 102, 2692–2694.

Lachmann, N., Ackermann, M., Frenzel, E., Liebhaber, S., Brenning, S., Happle, C., Hoffmann, D., Klimenkova, O., Luttge, D., Buchegger, T., et al. (2015). Large-scale hematopoietic differentiation of human induced pluripotent stem cells provides granulocytes or macrophages for cell replacement therapies. *Stem Cell Reports* 4, 282–296.

Lachmann, N., Happle, C., Ackermann, M., Luttge, D., Wetzke, M., Merkert, S., Hetzel, M., Kensah, G., Jara-Avaca, M., Mucci, A., et al.

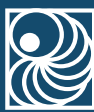

- (2014). Gene correction of human induced pluripotent stem cells repairs the cellular phenotype in pulmonary alveolar proteinosis. *Am. J. Respir. Crit. Care Med.* *189*, 167–182.
- Mucci, A., Kunkiel, J., Suzuki, T., Brenning, S., Glage, S., Kuhnel, M.P., Ackermann, M., Happle, C., Kuhn, A., Schambach, A., et al. (2016). Murine iPSC-derived macrophages as a tool for disease modeling of hereditary pulmonary alveolar proteinosis due to *Csf2rb* deficiency. *Stem Cell Reports* *7*, 292–305.
- Novak, U., Harpur, A.G., Paradiso, L., Kanagasundaram, V., Jaworowski, A., Wilks, A.F., and Hamilton, J.A. (1995). Colony-stimulating factor 1-induced STAT1 and STAT3 activation is accompanied by phosphorylation of Tyk2 in macrophages and Tyk2 and JAK1 in fibroblasts. *Blood* *86*, 2948–2956.
- Olbrich, P., Martinez-Saavedra, M.T., Perez-Hurtado, J.M., Sanchez, C., Sanchez, B., Deswarte, C., Obando, I., Casanova, J.L., Speckmann, C., Bustamante, J., et al. (2015). Diagnostic and therapeutic challenges in a child with complete interferon-gamma receptor 1 deficiency. *Pediatr. Blood Cancer* *62*, 2036–2039.
- Reuter, U., Roesler, J., Thiede, C., Schulz, A., Classen, C.F., Oelschlagel, U., Debatin, K.M., and Friedrich, W. (2002). Correction of complete interferon-gamma receptor 1 deficiency by bone marrow transplantation. *Blood* *100*, 4234–4235.
- Roesler, J., Horwitz, M.E., Picard, C., Bordigoni, P., Davies, G., Koscielniak, E., Levin, M., Veys, P., Reuter, U., Schulz, A., et al. (2004). Hematopoietic stem cell transplantation for complete IFN-gamma receptor 1 deficiency: a multi-institutional survey. *J. Pediatr.* *145*, 806–812.
- Roesler, J., Kofink, B., Wendisch, J., Heyden, S., Paul, D., Friedrich, W., Casanova, J.L., Leupold, W., Gahr, M., and Rosen-Wolff, A. (1999). *Listeria monocytogenes* and recurrent mycobacterial infections in a child with complete interferon-gamma-receptor (IFN $\gamma$ IR1) deficiency: mutational analysis and evaluation of therapeutic options. *Exp. Hematol.* *27*, 1368–1374.
- Rottman, M., Soudais, C., Vogt, G., Renia, L., Emile, J.F., Decaluwe, H., Gaillard, J.L., and Casanova, J.L. (2008). IFN-gamma mediates the rejection of haematopoietic stem cells in IFN-gammaR1-deficient hosts. *PLoS Med.* *5*, e26.
- Sontag, S., Forster, M., Qin, J., Wanek, P., Mitzka, S., Schuler, H.M., Koschmieder, S., Rose-John, S., Sere, K., and Zenke, M. (2017). Modelling IRF8 deficient human hematopoiesis and dendritic cell development with engineered iPSCs. *Stem Cells* *35*, 898–908.
- Sturgeon, C.M., Ditadi, A., Awong, G., Kennedy, M., and Keller, G. (2014). Wnt signaling controls the specification of definitive and primitive hematopoiesis from human pluripotent stem cells. *Nat. Biotechnol.* *32*, 554–561.
- Yamanaka, S., and Takahashi, K. (2006). Induction of pluripotent stem cells from mouse fibroblast cultures. *Tanpakushitsu Kakusan Koso* *51*, 2346–2351.

**Stem Cell Reports, Volume 10**

**Supplemental Information**

**Impaired IFN $\gamma$ -Signaling and Mycobacterial Clearance in IFN $\gamma$ R1-Deficient Human iPSC-Derived Macrophages**

**Anna-Lena Neehus, Jenny Lam, Kathrin Haake, Sylvia Merkert, Nico Schmidt, Adele Mucci, Mania Ackermann, Madline Schubert, Christine Happle, Mark Philipp Kühnel, Patrick Blank, Friederike Philipp, Ralph Goethe, Danny Jonigk, Ulrich Martin, Ulrich Kalinke, Ulrich Baumann, Axel Schambach, Joachim Roesler, and Nico Lachmann**

Figure S1

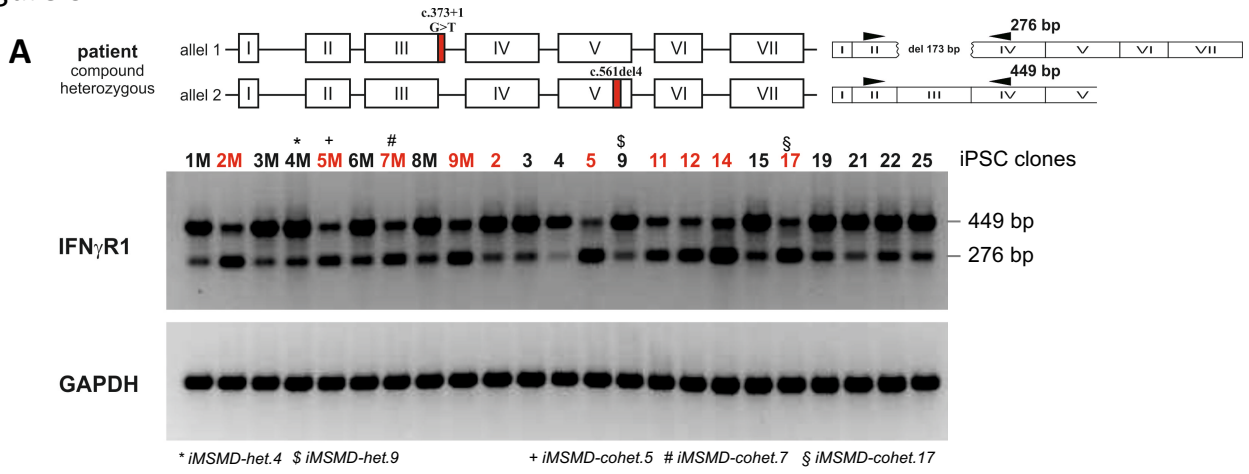

Figure S2

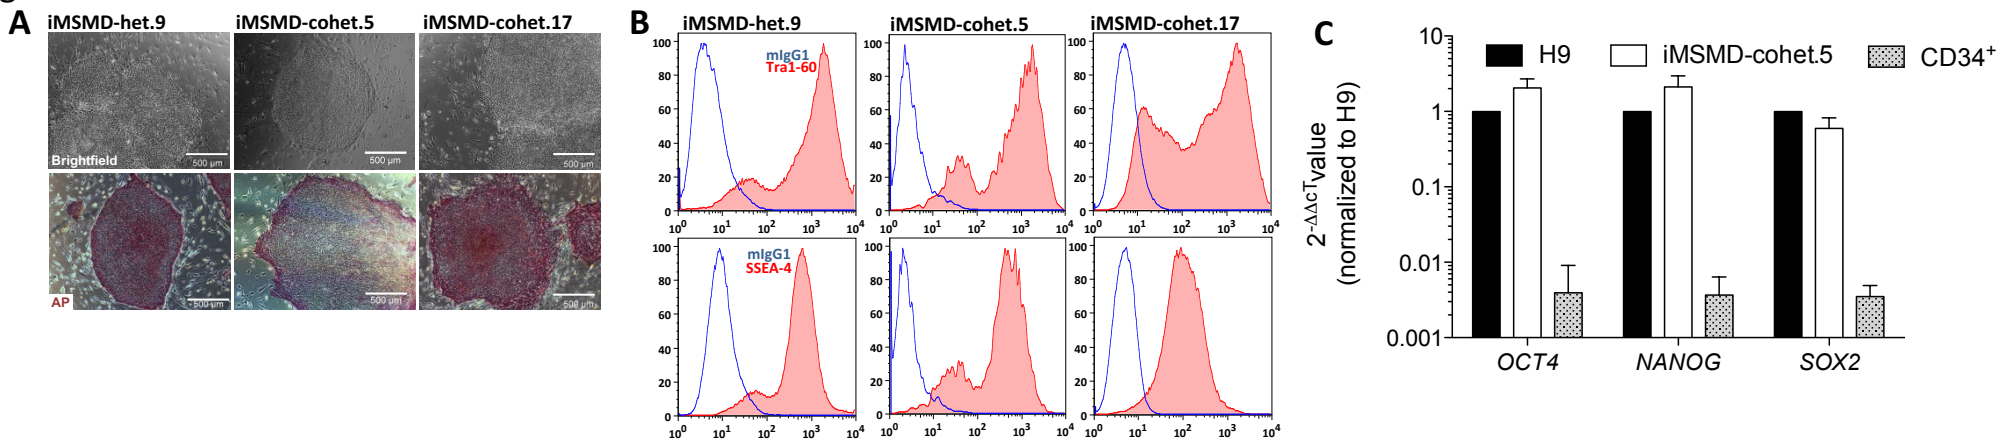

**D** iMSMD-het.9

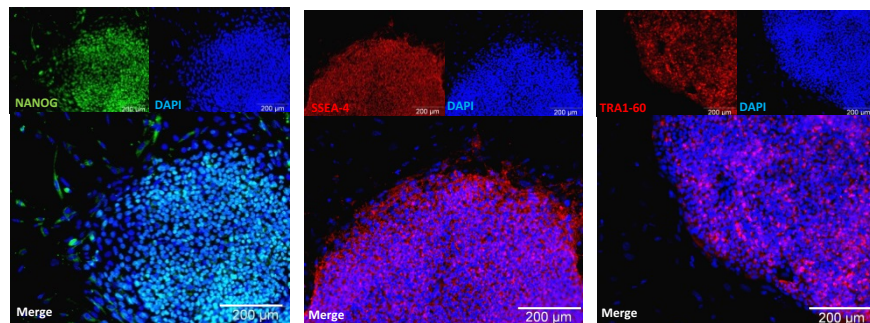

iMSMD-cohet.5

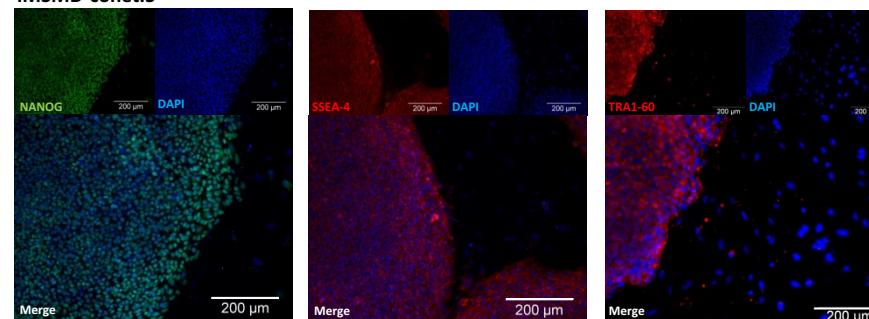

iMSMD-cohet.17

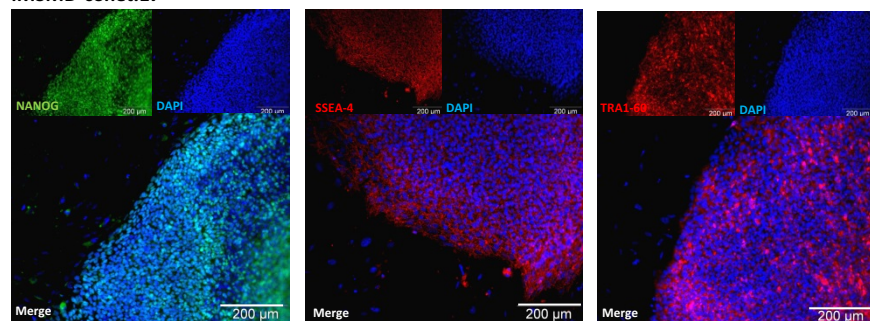

**E**

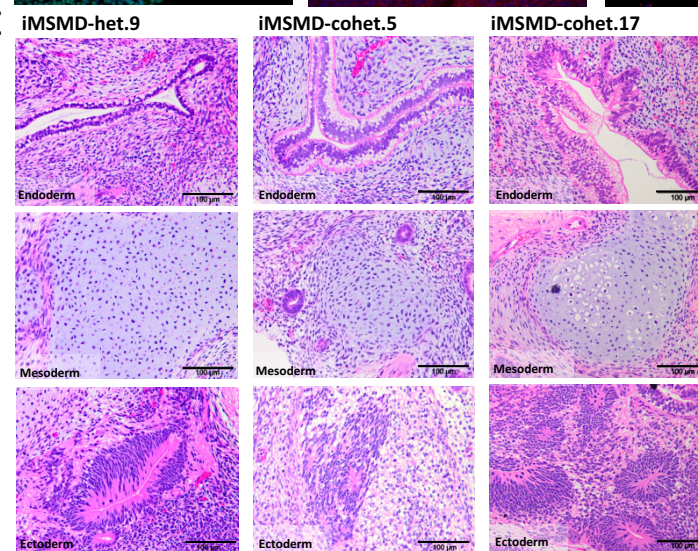

Figure S3

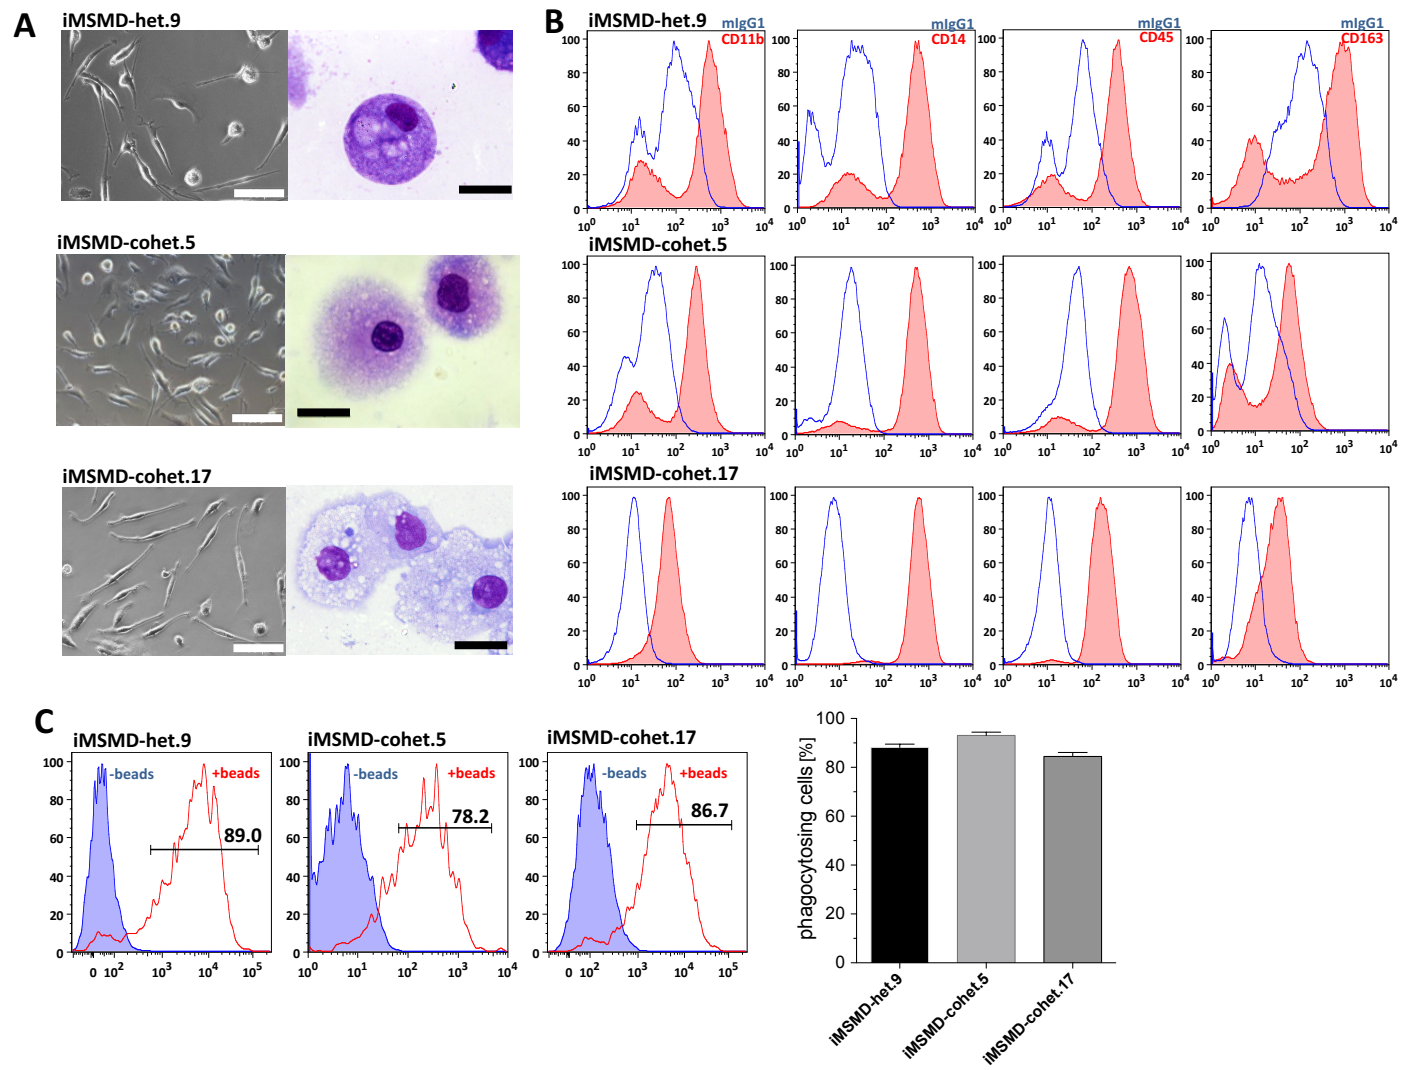

Figure S4

**A**

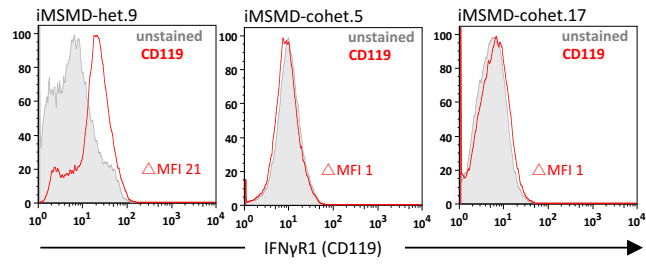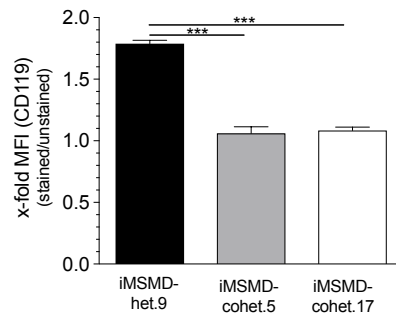

**B**

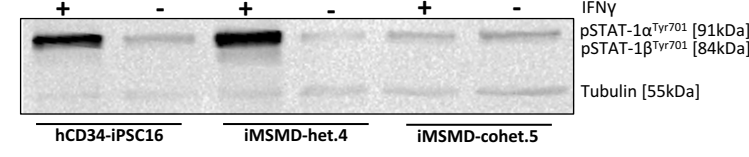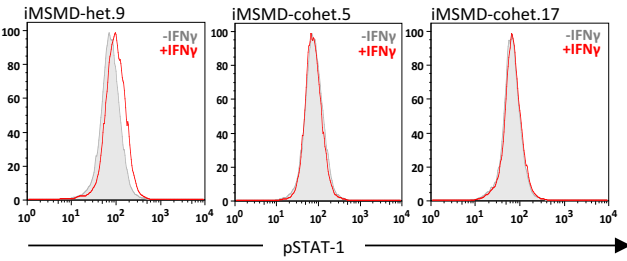

**C**

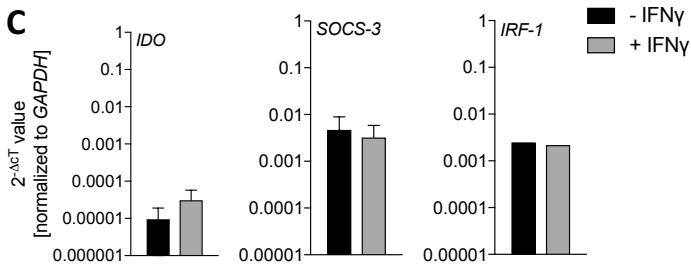

**D**

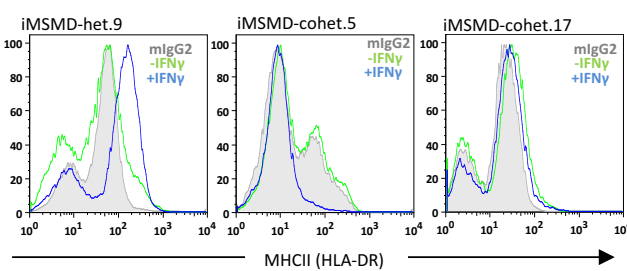

## Supplemental Information

### Online Materials and Methods

#### Ethical statement

Human peripheral blood samples were collected after written informed consent of the donor at Universitätsklinikum Dresden (Germany). Ethical vote No. 2127-2014 was approved by the Institutional Ethical Committee at Hannover Medical School (Hannover, Germany).

#### Generation and cultivation of human iPS cells

Peripheral blood was collected from a previously described patient (Reuter et al., 2002; Roesler et al., 1999) CD34<sup>+</sup> cells were isolated using magnetic activated cell sorting (MACS) (Miltenyi, Bergisch-Gladbach, Germany), and cultured in StemSpan (StemCells, Cologne, Germany) supplemented with 2 mM L-glutamine, 1 % penicillin-streptomycin, 100 ng/ml human stem cell factor, 100 ng/ml hFlt3-L and 50 ng/ml human thrombopoietin (Peprotech, Hamburg, Germany) for 24 hours. For iPSC generation CD34<sup>+</sup> cells were transduced with the “4 in 1” all in one third-generation self-inactivating lentiviral reprogramming vector (Warlich et al., 2011) on Retronectin (Takahara, Otsu, Japan)-coated dishes with a multiplicity of infections of 5, 10, or 20 in complete StemSpan medium. 24 hours after transduction 0.5 μM valproic acid was added and medium change was performed daily. After 4 days, 20 ng/ml basic fibroblast growth factor (bFGF) (Peprotech) was added and 5 days after transduction, cells were transferred to irradiated mouse embryonic fibroblasts from CF1 mouse strain and grown in half-half medium consisting of medium I (complete StemSpan) and human embryonic stem cell (ESC) medium II (knock-out Dulbecco's modified Eagle medium, 20% knock-out serum replacement, 0.1 mM beta-mercaptoethanol, 1 mM L-glutamine, 1% nonessential amino acids, and 20 ng/ml bFGF; Invitrogen, Darmstadt, Germany). When initial colonies were observed, medium was completely changed to human ESC medium. iPSC cultivation was performed by splitting every 5-7 days depending on colony size by 2 mg/ml collagenase (Invitrogen).

#### Characterization of iPSCs

Immunofluorescence staining was carried out according to standard protocols. Primary antibodies used were anti-OCT4 (Santa-Cruz, Heidelberg, Germany (sc-5279); 1:200), anti-NANOG (Abcam, Cambridge, UK; (ab80892) 1:50), anti-TRA1-60 (Millipore, Billerica, MA (MAB4360); 1:250) and anti-SSEA-4 (Millipore; (MAB4304) 1:250). Secondary antibodies used include goat anti-mouse IgG Alexa-546 (A-11003) and goat anti-mouse IgM Alexa-488 (A-10680) (Invitrogen). Nuclei were costained with 4,6-diamidino-2-phenylindole DAPI (1:2000). TRA1-60 expression was characterized using the same protocol with the following antibodies: 1 hour TRA1-60 Biotin (1:250; eBioscience, Frankfurt am Main, Germany (13-8863-82)) followed by 45 minutes HRP-Avidine (1:500; eBioscience (18-4100-51)) and 5 minutes diaminobenzidine (Invitrogen). Alkaline Phosphatase staining was performed using the Alkaline Phosphatase Staining Kit (Stemgent, Cambridge, MA, USA) according to the manufacturer's instructions.

For analysis of mRNA expression levels total RNA was isolated using the miRNAeasy Kit (Qiagen, Hilden, Germany) and additional DNase I treatment (DNase I, RNase-free [1 U/μl]; Thermo Fisher Scientific, Waltham, MA, USA). For reverse transcription RevertAid reverse transcriptase and random hexamer primers (Thermo Fisher Scientific) were used. The following predesigned assays were obtained from Applied Biosystems (Darmstadt, Germany) for TaqMan-based qRT-PCR: *GAPDH* (Hs\_99999905), *NANOG* (Hs\_02387400), *SOX2* (Hs\_01053049) and *OCT4* (Hs\_3005111).

#### Undirected in vitro differentiation

hiPSCs were detached from the feeder layer by collagenase IV, dispersed into small clumps and cultured in differentiation medium (80% IMDM supplemented with 20% fetal calf serum, 1 mM L-glutamine, 0.1 mM β-mercaptoethanol and 1% nonessential amino acid stock) in ultra-low attachment plates (Corning Inc., NY, USA) for 7 days. Subsequently, EBs were plated onto 0.1% gelatine coated tissue culture dishes and cultured for a further 13 days before fixation and immunostaining. Cells were fixed with 4% paraformaldehyde (w/v) and stained by standard protocols using primary antibodies anti-beta3-Tubulin (Upstate, NY, USA (05-559); IgG2a, 1:400), anti-AFP (R&D Systems, Minneapolis, USA (189502); IgG1, 1:800) and anti-Desmin (Progen, Heidelberg, Germany (10519); IgG1, 1:20) and secondary antibody DyLight®549-donkey-anti-mouse-IgG (1:200, Jackson Immunoresearch Laboratories (715-165-150)). Corresponding isotype antibodies were used for negative control staining. Cells were counterstained with DAPI (Sigma) and analysed with an AxioObserver A1 fluorescence microscope and Axiovision software 4.71 (Zeiss).

#### Teratoma induction

hiPSC were expanded in co-culture with C3H murine embryonic fibroblasts. Cells were detached with Trypsin/EDTA (Pan/Biotech). Harvested cells (3\*10<sup>6</sup> hiPSC/ flank) were resuspended in medium containing 20μm p160ROCK inhibitor (Biotechnie). Final cell suspension volume of 100-150μl (one injection) was mixed



with 150µl Matrigel Matrix (Corning) and kept at 4°C until subcutaneous injection. Teratoma assay was performed in adult NSGS mice ((NOD.Cg-Prkdcscid Il2r<sup>tm1Wjl</sup> Tg(CMV-IL3,CSF2,KITLG)1Eav/MloySzJ). All animal experiments have been approved by the animal welfare committee of Lower Saxony and have been performed in accordance to the R3 regulations. NSGS mice have been housed in pathogen-free environment in the animal facility of Hannover Medical School with access to food and water *ad libitum*.

### **HE staining**

Isolated tissue was fixed in 4% buffered formaldehyde (Carl Roth GmbH+ Co. KG). Then, samples were embedded in paraffin and sectioned into 3µm slices. Hematoxylin and Eosin staining was performed using standard histological procedures. Analysis was done with microscope BX51, camera XC50 and software Cell<sup>^</sup>F version 3.4 (all Olympus).

### **Genotyping**

For genotyping, genomic DNA was prepared using QIAamp Blood Mini Kit (QIAGEN) according to manufacturer's instructions and 100 ng of gDNA was amplified by PCR with Phusion® High-Fidelity DNA polymerase (NEB) according to manufacturer's instructions and following primers: forward 5'- ACA CCT CCA TTG CTC CAC TG -3' and reverse 5'- TCA GTT GTA ACA CCC CAC ACA -3'. The PCR products were sequenced using the reverse primer. For the validation of the exon III skipping, RT-PCR on coding DNA was applied. Therefore, cDNA was amplified by PCR with GoTaq®HotStart Polymerase (Promega) according to manufacturer's instruction and following primers: forward 5'- CTT GTC ATG CAG GGT GTG AG -3' and reverse 5'- TCC TGC TCG TCT CCA TTT ACA -3'.

### **Flow Cytometric Analysis**

Hematopoietic and non-hematopoietic surface marker expression was performed as described before (Lachmann et al., 2015). Antibodies were used as follows: CD11b-APC (12-0118-42), CD14-PE(12-0149-41), CD45-APC (17-0459-42), CD163-PE (12-1639-41), CD119-PE (12-1199), HLA-DR-APC (17-9956), SSEA4-FITC (560126, Biolegend), TRA1-60-PE (12-8863-80), isotype controls; mouse IgG1k-PE (12-4714-81) or APC (17-4714-81), mouse IgG2bk-APC (17-4732), mouse IgMk-PE (401611, Biolegend) and mouse IgG3 (114742) (if not otherwise noted all antibodies are from eBioscience), minus one control represents the staining without the respective specific antibody.

For measurement of HLA-DR upregulation after IFN $\gamma$  stimulation, iPSC-derived macrophages were either left unstimulated or stimulated with 25 ng/ml IFN $\gamma$  for 24 hours.

### **Cytospins**

For cytopins 3x10<sup>4</sup> cells were centrifuged on object slides at 600 x g for 7 minutes. Subsequently, slides were stained for 5 minutes in May-Grünwald staining solution (0,25% (w/v) in methanol), followed by 20 minutes in 5% of Giemsa azur-eosin-methylene blue solution (0,4% (w/v) in Methanol, working solution was 0.02%) and washed extensively in aqua dest.

### **Phagocytosis**

For assessment of phagocytosis, 1x10<sup>5</sup> cells were seeded in 96-well plates in standard medium. After >12 hours of settling, cells were incubated for 2 hours with carboxylate fluorescent latex-beads (1 µm in diameter; Polysciences, Warrington, PA, USA) at a concentration of 1:200. Subsequently, cells were washed extensively, and the amount of incorporated beads was assessed by flow cytometry on a FACSCanto II flow cytometer (BD) and further analyzed using FlowJo V10 (Tree Star).

### **qRT-PCR**

For measurement of mRNA expression levels macrophages were stimulated with 25 ng/ml IFN $\gamma$  for 24 hours and qRT-PCR was performed as described above.

SYBR Green qRT-PCR was carried out using SYBR Green PCR Master Mix (Applied Biosystems) with the following predesigned Quantitect Primer Assay (Qiagen): *GAPDH* (QT01192646), *IDO* (QT00000504), *SOCS-3* (QT00244580), *IRF-1* (QT00494536). qRT-PCR was performed on a StepOnePlus thermocycler (Applied Biosystems) under the following conditions: 40 cycles of 95°C for 15 seconds and 60°C for 1 minute.

### **STAT1 Phosphorylation Assay**

Macrophages were stimulated with 25 ng/ml IFN $\gamma$  for 24 hours. Proteins were isolated by utilizing radioimmunoprecipitation assay buffer and protease as well as phosphatase inhibitor according to the manufacturer's instructions. Phosphorylated STAT1 was detected by Western blot analysis using phospho-STAT1 (Tyr701; 9167) and  $\alpha$ -tubulin (2144) antibodies (Cell Signaling Technology, Frankfurt am Main, Germany and Sigma Aldrich). Membranes were incubated with the horseradish-peroxidase-coupled secondary

antibody (111-035-144; Jackson ImmunoResearch, Suffolk, UK) at room temperature for 1 hour, followed by Western blot run with 15 µg of protein in a 12% sodium dodecyl sulfate gel. pSTAT1/α-tubulin intensity ratios were determined by densitometry using Bio-Rad Quantity One analyzing software at an exposure time of 90 seconds.

Flow cytometric analysis of phosphorylated STAT1 was performed using pSTAT1-Ser727 (BioLegend; 686403) according to the manufacturer's instructions. iPSC-derived macrophages were either left unstimulated or were stimulated with 25 ng/ml IFNγ for 24 hours before analysis.

### **Mycobacterial Killing Assay**

Mycobacterial killing by macrophages was determined as previously described (Kuehnel et al., 2001). Briefly, *Mycobacterium bovis* (BCG) cultures in exponential growth phase were pelleted, washed twice in PBS pH 7.4 and re-suspended in DMEM medium to a final OD<sub>600</sub>: 0.1. Clumps of bacteria were removed by ultrasonic treatment of bacteria suspensions in an ultrasonic water bath for 5 minutes followed by a low speed centrifugation (120 x g) for 2 minutes. Single cell suspension was verified by light microscopy.

iPS cell generated macrophages were seeded onto 12-well tissue culture plates at a density of 0.5×10<sup>5</sup> cells per well. 24 hours before infection cells were stimulated with 25 ng/ml IFNγ. The infection was carried out using a multiplicity of infection (MOI) of 100:1 for 1 h (OD<sub>600</sub>~0.1). In each experiment, after 1 hour infection gentamicin (10 µg/ml) was added. At 1 and 24 p.i. cells were washed twice with PBS and scraped off the plates in 1 ml of 1% Nonidet P40 in PBS. Macrophages were disrupted by 10 passages through a 24-gauge needle. Tenfold serial dilutions of the homogenates were prepared with PBS, and 100 µl of each was plated on Middlebrook 7H10 agar plates. After incubation for up to 2 weeks at 37°C, colony-forming units (cfu) were counted.

### **Supplemental references**

Kuehnel, M.P., Goethe, R., Habermann, A., Mueller, E., Rohde, M., Griffiths, G., and Valentin-Weigand, P. (2001). Characterization of the intracellular survival of *Mycobacterium avium* ssp. *paratuberculosis*: phagosomal pH and fusogenicity in J774 macrophages compared with other mycobacteria. *Cell Microbiol* 3, 551-566.

Lachmann, N., Ackermann, M., Frenzel, E., Liebhaber, S., Brenning, S., Happle, C., Hoffmann, D., Klimenkova, O., Luttge, D., Buchegger, T., et al. (2015). Large-scale hematopoietic differentiation of human induced pluripotent stem cells provides granulocytes or macrophages for cell replacement therapies. *Stem Cell Reports* 4, 282-296.

Lachmann, N., Happle, C., Ackermann, M., Luttge, D., Wetzke, M., Merkert, S., Hetzel, M., Kensah, G., Jara-Avaca, M., Mucci, A., et al. (2014). Gene correction of human induced pluripotent stem cells repairs the cellular phenotype in pulmonary alveolar proteinosis. *Am J Respir Crit Care Med* 189, 167-182.

Reuter, U., Roesler, J., Thiede, C., Schulz, A., Classen, C.F., Oelschlagel, U., Debatin, K.M., and Friedrich, W. (2002). Correction of complete interferon-gamma receptor 1 deficiency by bone marrow transplantation. *Blood* 100, 4234-4235.

Roesler, J., Kofink, B., Wendisch, J., Heyden, S., Paul, D., Friedrich, W., Casanova, J.L., Leupold, W., Gahr, M., and Rosen-Wolff, A. (1999). *Listeria monocytogenes* and recurrent mycobacterial infections in a child with complete interferon-gamma-receptor (IFNγR1) deficiency: mutational analysis and evaluation of therapeutic options. *Exp Hematol* 27, 1368-1374.

Warlich, E., Kuehle, J., Cantz, T., Brugman, M.H., Maetzig, T., Galla, M., Filipczyk, A.A., Halle, S., Klump, H., Scholer, H.R., et al. (2011). Lentiviral vector design and imaging approaches to visualize the early stages of cellular reprogramming. *Mol Ther* 19, 782-789.

### **Supplemental figure legends**

**(Related to figure 1) Figure S1 Supplementary figure 1 Identification of the genetic background of iMSMD iPSC lines. (A)** RT-PCR based screen to identify the heterozygous c373+1 G>T transition in heterozygous and compound heterozygous iMSMD iPSC lines. Sequence specific primers for exon III were designed to amplify either a 276bp fragment describing the heterozygous 173bp deletion and to amplify a 449bp fragment to amplify the second functional allele. Red color indicates compound heterozygous iPSC clones. Primers for *GAPDH* were used as internal loading control.

**(Related to figure 2) Figure S2 Supplementary figure 2 Characterization of MSMD iPSC lines (A)** Microscopy analysis of iPSC lines derived from either heterozygous (iMSMD-het.9) or compound heterozygous (iMSMD-cohet.5 and .17) donor cells. Images are shown for brightfield and alkaline phosphatase (AP) staining (scale bar = 500 µm). **(B)** Flow cytometry analysis of TRA1-60 and SSEA-4 expression on iMSMD iPSCs (blue line: isotype; red filled line: surface marker). **(C)** qRT-PCR to evaluate endogenous expression of *OCT4*,

*NANOG* and *SOX2* in iMSMD-cohet.5 relative to H9 control cells (n=4, independent experiments, mean  $\pm$ SEM). **(D)** Immunofluorescence staining of pluripotency associated factors for NANOG (green), SSEA-4 (red) and TRA1-60 (red) (scale bar = 200  $\mu$ m). **(E)** Representative hematoxylin and eosin (HE) staining of teratoma formation after transplantation of iMSMD-het.9 (endoderm: epithelium lining a luminal surface; mesoderm: cartilage; ectoderm: immature neuroepithelium), iMSMD-cohet.5 (endoderm: epithelium lining a luminal surface; mesoderm: cartilage; ectoderm: immature neuroepithelium) or iMSMD-cohet.17 (endoderm: intestinal-like epithelium with goblet cells; mesoderm: cartilage; ectoderm: immature neuroepithelium) cells into immunocompromised NSGS mice (scale bar = 100 $\mu$ m).

**(Related to figure 3) Figure S3 Supplementary figure 3 Hematopoietic differentiation of iMSMD lines**

Heterozygous (iMSMD-het.9) and compound heterozygous (iMSMD-cohet.5 and .17) iPSC lines has been differentiated towards macrophages. **(A)** Microscopic analysis of macrophages in brightfield images (left, scale bar: 100 $\mu$ m) or cytospin images (right, scale bar: 20 $\mu$ m). **(B)** Surface marker expression by flow cytometry of hCD11b, hCD14, hCD45 and hCD163 on macrophages derived from iMSMD-het.9, iMSMD-cohet.5 and iMSMD-cohet.17 lines (blue line: isotype; red filled line: surface marker). **(C)** Ability of iPSC-derived macrophages to phagocytose latex-beads. Left images show representative flow cytometric analysis of macrophages (blue filled line: cells without beads, red line: cells beads). Right image shows macrophages which are positive for fluorescent latex-beads (n=4, independent experiments, mean  $\pm$ SEM).

**(Related to figure 4) Figure S4 Supplementary figure 4 Disease phenotype of differentiated iMSMD-derived macrophages.**

**(A)** Left images show representative flow cytometric analysis of IFN $\gamma$ R1 (CD119) surface marker expression by flow cytometry on iMSMD-derived macrophages (grey filled line: unstained, red line: CD119). Right images show delta mean fluorescent intensity (MFI) of CD119 expression (delta MFI was calculated by subtracting unstained (negative) MFI from CD119 (positive) MFI) relative to unstained control (n=3, independent experiments, mean  $\pm$ SEM; \*\*\*significance of  $p < 0.01$  by One-Way ANOVA). **(B)** Analysis of STAT1 phosphorylation (pSTAT1) in macrophage subsets stimulated with IFN $\gamma$ . Left image shows western blot analysis of pSTAT1 (approx. 90kDa) in iMSMD-cohet.5- and hCD34-iPSC16-derived macrophages (Tubulin (50kDa) served as a control). Right images show pSTAT1 expression by flow cytometry of iMSMD-derived macrophages (grey filled line: unstimulated, red line: IFN $\gamma$  stimulated). **(C)** Quantitative PCR of *IDO*, *SOCS-3* and *IRF-1* in iMSMD-cohet.5- and hCD34-iPSC16-derived macrophages after stimulation with IFN $\gamma$ . Values are normalized to *GAPDH* as a housekeeping gene (n= 1-2, independent experiments, mean  $\pm$ SEM). **(D)** Flow cytometric analysis of MHC-II (HLA-DR) surface marker expression by flow cytometry on iMSMD-derived macrophages before and after stimulation with IFN $\gamma$  (grey filled line: isotype, green line: non-stimulated control, blue line: IFN $\gamma$  stimulated).
